# Supplementary material for: Fabrication of Calix[]arene Derivative Monolayers to Control Orientation of Antibody Immobilization
Source: Int J Mol Sci. 2014 Mar 31;15(4):5496–507. doi: 10.3390/ijms15045496 (PMC4013577; doi:10.3390/ijms15045496)

## Supplementary Information

**Figure S1.** Surface plasmon resonance (SPR) angle shift respect to the indirect immobilization method: Cal-4 derivative 1 (a); Cal-4 derivative 2 (b) and Cal-4 derivative 3 (c).

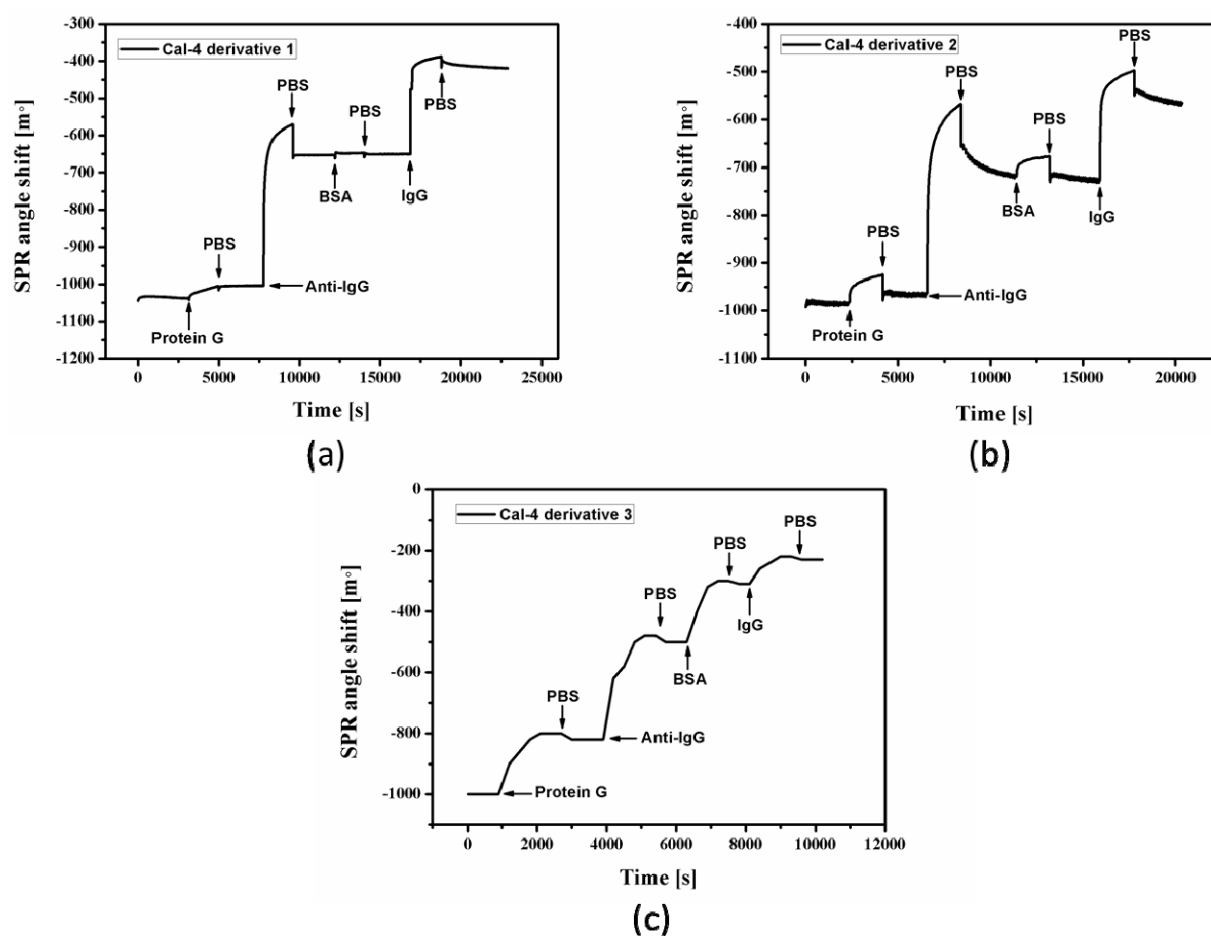

Supplement: Supplementary file 1 [file ijms-15-05496-s001.pdf]
